# Supplementary material for: Comparison of hydrocortisone and prednisone in the glucocorticoid replacement therapy post-adrenalectomy of Cushing's Syndrome
Source: PubMed Central journal article supplement (PMC5739705; doi:10.18632/oncotarget.20597), 2017-08-31
Supplement: oncotarget-08-106113-s001.pdf [file oncotarget-08-106113-s001.pdf]

# Comparison of hydrocortisone and prednisone in the glucocorticoid replacement therapy post-adrenalectomy of Cushing's Syndrome

## SUPPLEMENTARY MATERIALS

**Supplementary Table 1: Interview questionnaire**

| Name                 |                         | Before adrenalectomy |                  |           |             |                    | After adrenalectomy |   |   |   |   |
|----------------------|-------------------------|----------------------|------------------|-----------|-------------|--------------------|---------------------|---|---|---|---|
| Tel                  |                         | 1                    | 2                | 3         | 4           | 5                  | 1                   | 2 | 3 | 4 | 5 |
| Symptoms             | Full moon face          |                      |                  |           |             |                    |                     |   |   |   |   |
|                      | Centripetal obesity     |                      |                  |           |             |                    |                     |   |   |   |   |
|                      | Flushing                |                      |                  |           |             |                    |                     |   |   |   |   |
|                      | Stripes                 |                      |                  |           |             |                    |                     |   |   |   |   |
|                      | Edema                   |                      |                  |           |             |                    |                     |   |   |   |   |
|                      | Fatigue                 |                      |                  |           |             |                    |                     |   |   |   |   |
|                      | Hirsutism               |                      |                  |           |             |                    |                     |   |   |   |   |
|                      | Menoxenia/<br>Impotence |                      |                  |           |             |                    |                     |   |   |   |   |
|                      | Hair loss               |                      |                  |           |             |                    |                     |   |   |   |   |
|                      |                         | Subtotal             |                  |           |             |                    |                     |   |   |   |   |
| Complications        | Hypertension            |                      |                  |           |             |                    |                     |   |   |   |   |
|                      | Diabetes                |                      |                  |           |             |                    |                     |   |   |   |   |
|                      |                         | Subtotal             |                  |           |             |                    |                     |   |   |   |   |
| Psychiatry           | Insomnia                |                      |                  |           |             |                    |                     |   |   |   |   |
|                      | Amnesia                 |                      |                  |           |             |                    |                     |   |   |   |   |
|                      | Irritability            |                      |                  |           |             |                    |                     |   |   |   |   |
|                      | Depression              |                      |                  |           |             |                    |                     |   |   |   |   |
|                      |                         | subtotal             |                  |           |             |                    |                     |   |   |   |   |
| Total                |                         |                      |                  |           |             |                    |                     |   |   |   |   |
| Quality of Life      |                         | Very satisfied       | Rather satisfied | satisfied | unsatisfied | Highly unsatisfied |                     |   |   |   |   |
|                      |                         |                      |                  |           |             |                    |                     |   |   |   |   |
| Overall satisfaction |                         | Very satisfied       | Rather satisfied | satisfied | unsatisfied | Highly unsatisfied |                     |   |   |   |   |
|                      |                         |                      |                  |           |             |                    |                     |   |   |   |   |
| Height               |                         | Cm                   |                  |           |             |                    |                     |   |   |   |   |
| Bodyweight           |                         | Kg                   |                  |           |             |                    | Kg                  |   |   |   |   |

Grading: 1. No condition; 2. Insignificant condition; 3. With condition; 4. Significant condition; 5. Very significant condition.

**Supplementary Table 2: Serum ATCH concentration (pg/ml) post-adrenalectomy**

|           | Adrenal Adenoma ( <i>n</i> = 14) | CD ( <i>n</i> = 6) |
|-----------|----------------------------------|--------------------|
| admission | 14.8 ± 9.1                       | 243.6 ± 121.6      |
| 1 month   | 17.8 ± 9.7 ▲                     | 356.8 ± 143.1 ▲    |
| 3 months  | 20.2 ± 11.1 ▲                    | 363.4 ± 143.4 ▲    |
| 6 months  | 25.2 ± 11.3 ▲                    | 380.6 ± 136.0 ▲    |

**Supplementary Table 3: Cortisol levels post-adrenalectomy**

| Stage     | Prednisone           |                        | Hydrocortisone       |                        |
|-----------|----------------------|------------------------|----------------------|------------------------|
|           | Blood cortisol ug/ml | Urine cortisol ug/24 h | Blood cortisol ug/ml | Urine cortisol ug/24 h |
| admission | 31.06 ± 11.21        | 747.16 ± 446.1523      | 35.57 ± 9.96         | 962.15 ± 649.42        |
| day 1     | 29.00 ± 15.39        | 1752.99 ± 1243.81 ▲    | 33.65 ± 9.82         | 2136.40 ± 1444.02 ▲    |
| day 2     | 15.94 ± 12.93 ▲      | 1331.58 ± 783.07 ▲     | 26.56 ± 9.29 ▲       | 1488.81 ± 572.21 ▲     |
| day 6     | 8.78 ± 5.94 ▲        | 541.60 ± 363.22        | 16.61 ± 8.23 ▲       | 847.97 ± 673.63        |
| day 7     | 7.12 ± 4.78 ▲        | 372.50 ± 230.76 ▲      | 10.82 ± 6.54 ▲       | 476.27 ± 264.02 ▲      |
| 1 month   | 5.54 ± 1.45 ▲        | 164.48 ± 120.48 ▲      | 5.01 ± 5.48 ▲        | 123.04 ± 162.04 ▲      |
| 3 months  | 3.95 ± 0.73 ▲        | 84.27 ± 42.71 ▲        | 3.46 ± 4.09 ▲        | 72.14 ± 56.27 ▲        |
| 6 months  | 3.55 ± 1.33 ▲        | 63.84 ± 22.58 ▲        | 4.47 ± 3.12 ▲        | 65.88 ± 17.58 ▲        |

**Supplementary Table 4: Blood pressures post-adrenalectomy**

|           | Prednisone       |                   | Hydrocortisone   |                   |
|-----------|------------------|-------------------|------------------|-------------------|
|           | systolic (mm Hg) | diastolic (mm Hg) | systolic (mm Hg) | diastolic (mm Hg) |
| admission | 145.90 ± 12.65   | 89.45 ± 14.38     | 149.27 ± 8.62    | 94.41 ± 7.20      |
| discharge | 131.55 ± 13.18 ▲ | 85.05 ± 9.68      | 134.64 ± 14.27 ▲ | 85.36 ± 9.78 ▲    |
| 1 month   | 127.65 ± 7.33 ▲  | 83.1 ± 5.08 ▲     | 129.36 ± 13.70 ▲ | 79.27 ± 7.73 ▲    |
| 3 months  | 122.60 ± 6.48 ▲  | 78.8 ± 5.48 ▲     | 123.05 ± 11.89 ▲ | 78.81 ± 7.40 ▲    |
| 6 months  | 119.10 ± 10.24 ▲ | 72.00 ± 6.62 ▲    | 116.82 ± 10.90 ▲ | 77.95 ± 7.75 ▲    |

**Supplementary Table 5: Electrolytes post-adrenalectomy**

| Stage     | Prednisone      |                  | Hydrocortisone  |                  |
|-----------|-----------------|------------------|-----------------|------------------|
|           | sodium mmol/L   | potassium mmol/L | sodium mmol/L   | potassium mmol/L |
| admission | 144.25 ± 5.29   | 3.41 ± 0.61      | 143.14 ± 3.24   | 3.52 ± 0.51      |
| discharge | 142.05 ± 2.33 ▲ | 4.01 ± 0.40 ▲    | 141.70 ± 2.31 ▲ | 3.79 ± 0.33 ▲    |
| 1 month   | 141.05 ± 2.89 ▲ | 4.10 ± 0.25 ▲    | 141.43 ± 2.19 ▲ | 3.81 ± 0.35 ▲    |
| 3 months  | 140.80 ± 3.09 ▲ | 4.23 ± 0.34 ▲    | 141.33 ± 2.47 ▲ | 3.97 ± 0.38 ▲    |
| 6 months  | 140.09 ± 3.88 ▲ | 4.07 ± 0.24 ▲    | 140.88 ± 3.24 ▲ | 3.96 ± 0.27 ▲    |

**Supplementary Table 6: Heart rate and blood glucose post-adrenalectomy**

| Stage     | Prednisone            |                          | Hydrocortisone        |                          |
|-----------|-----------------------|--------------------------|-----------------------|--------------------------|
|           | Heart rate per minute | FPG mmol/L               | Heart rate per minute | FPG mmol/L               |
| admission | 81.70 ± 7.01          | 6.88 ± 2.61              | 81.91 ± 12.01         | 6.57 ± 2.95              |
| discharge | 81.00 ± 8.42          | 5.93 ± 1.52              | 75.91 ± 9.05          | 5.73 ± 1.39              |
| 1 month   | 80.65 ± 5.40          | 5.29 ± 1.08 <sup>▲</sup> | 80.73 ± 7.04          | 4.83 ± 0.77 <sup>▲</sup> |
| 3 months  | 79.65 ± 6.32          | 4.96 ± 0.51 <sup>▲</sup> | 77.18 ± 3.63          | 4.55 ± 0.58 <sup>▲</sup> |
| 6 months  | 77.70 ± 5.07          | 4.96 ± 0.49 <sup>▲</sup> | 77.50 ± 5.74          | 4.38 ± 0.60 <sup>▲</sup> |

Note: raw data in the supplemental tables are presented in mean ± SD, then transformed to mean ± SEM for statistical analysis by normalizing to the sample size.
